# Supplementary material
Source: Springer Nature journal article supplement (https://www.springermedizin.de/resource/supplementary/12943_2012_1199_MOESM2_ESM.pdf/9552378)
Supplement: MOESM2 [file 9552378]

**Table 1S** Differentially regulated genes in G55 tumos after treatment with angiogenic inhibitors

| Gene                                             | Name                                             | Affimetrix ID | SLR  |
|--------------------------------------------------|--------------------------------------------------|---------------|------|
| <i>Tumstatin group vs. WT group</i>              |                                                  |               |      |
| MXD1                                             | MAX dimerization protein 1                       | 8042503       | +0,3 |
| PRL                                              | Prolactin                                        | 8124185       | +0,3 |
| PPARA                                            | Peroxisome proliferator-activated receptor alpha | 8073826       | +0,3 |
| <i>Tumstatin + Endostatin group vs. WT group</i> |                                                  |               |      |
| PRLR                                             | Prolactin receptor                               | 8111490       | +0,3 |
| FRMPD1                                           | FERM and PDZ domain containing                   | 8155284       | -0,3 |
| IL1F9                                            | Interleukin 1 family, member 9                   | 8044541       | -0,2 |
